# Supplementary material for: A century of change in global education variability and gender differences in education
Source: PLoS One. 2019 Feb 27;14(2):e0212692. doi: 10.1371/journal.pone.0212692 (PMC6392467; doi:10.1371/journal.pone.0212692)
Supplement: S1 Appendix — (DOCX) [file pone.0212692.s001.docx]

**Supporting Information**

**S1 Appendix.** Derivation of Equation (3).

Manipulating algebraically it is easy to show that

This is the decomposition we were looking for.
